# Supplementary material for: Cross-Linked α-Synuclein as Inhibitor of Amyloid Formation
Source: MDPI journal article supplement (doi:10.3390/ijms241713403), 2023-08-29
Supplement: s1 [file s1]

## Supporting Information

Nikoletta Murvai, Gabriella Gellen, András Micsonai, Gitta Schlosser, and József Kardos\*

\*Correspondence: kardos@elte.hu

**Supplementary Table S1. PDB IDs of amyloid structures of  $\alpha$ -synuclein**

| PDB IDs |      |      |      |      |      |
|---------|------|------|------|------|------|
| 2N0A    | 6OSM | 7E0F | 7V47 | 7XO3 | 8H03 |
| 6A6B    | 6PEO | 7L7H | 7V48 | 8A4L | 8H04 |
| 6CU7    | 6PES | 7LC9 | 7V49 | 8A9L | 8H05 |
| 6CU8    | 6RT0 | 7NCA | 7V4A | 8ADS | 8H00 |
| 6FLT    | 6RTB | 7NCG | 7V4B | 8ADU |      |
| 6L1U    | 6UFR | 7NCJ | 7WMM | 8AEX |      |
| 6L4S    | 6XYO | 7NCK | 7WNZ | 8BQV |      |
| 6LRQ    | 6XYP | 7OZG | 7W00 | 8BQW |      |
| 6OSJ    | 6XYQ | 7OZH | 7XO1 | 8CE7 |      |
| 6OSL    | 7C1D | 7UAK | 7XO2 | 8CEB |      |

**Supplementary Table S2. Frequencies of the DTSSP cross-links identified by MS**

| Res. #1 <sup>a</sup> | Res. #2 <sup>a</sup> | Occ. <sup>b</sup> | Res. #1 <sup>a</sup> | Res. #2 <sup>a</sup> | Occ. <sup>b</sup> | Res. #1 <sup>a</sup> | Res. #2 <sup>a</sup> | Occ. <sup>b</sup> |
|----------------------|----------------------|-------------------|----------------------|----------------------|-------------------|----------------------|----------------------|-------------------|
| 0                    | 6                    | 7                 | 6                    | 96                   | 1                 | 23                   | 58                   | 1                 |
| 0                    | 10                   | 5                 | 6                    | 97                   | 1                 | 23                   | 60                   | 2                 |
| 0                    | 12                   | 15                | 10                   | 12                   | 2                 | 23                   | 80                   | 2                 |
| 0                    | 21                   | 5                 | 12                   | 21                   | 2                 | 23                   | 97                   | 3                 |
| 0                    | 23                   | 7                 | 12                   | 23                   | 8                 | 32                   | 34                   | 1                 |
| 0                    | 32                   | 8                 | 12                   | 32                   | 2                 | 32                   | 43                   | 2                 |
| 0                    | 34                   | 6                 | 12                   | 34                   | 7                 | 32                   | 45                   | 1                 |
| 0                    | 43                   | 7                 | 12                   | 43                   | 2                 | 32                   | 97                   | 1                 |
| 0                    | 45                   | 8                 | 12                   | 45                   | 3                 | 34                   | 45                   | 9                 |
| 0                    | 58                   | 4                 | 12                   | 58                   | 2                 | 34                   | 58                   | 3                 |
| 0                    | 60                   | 5                 | 12                   | 60                   | 3                 | 34                   | 60                   | 7                 |
| 0                    | 96                   | 2                 | 12                   | 80                   | 3                 | 34                   | 96                   | 1                 |
| 0                    | 97                   | 4                 | 12                   | 96                   | 2                 | 34                   | 97                   | 2                 |
| 6                    | 12                   | 3                 | 12                   | 97                   | 2                 | 45                   | 58                   | 3                 |
| 6                    | 21                   | 2                 | 21                   | 34                   | 1                 | 45                   | 60                   | 3                 |
| 6                    | 23                   | 2                 | 21                   | 97                   | 1                 | 45                   | 80                   | 2                 |
| 6                    | 32                   | 1                 | 23                   | 32                   | 1                 | 45                   | 97                   | 3                 |
| 6                    | 34                   | 1                 | 23                   | 34                   | 9                 | 58                   | 97                   | 1                 |
| 6                    | 45                   | 1                 | 23                   | 43                   | 2                 | 60                   | 80                   | 2                 |
| 6                    | 60                   | 1                 | 23                   | 45                   | 4                 | 60                   | 97                   | 1                 |

<sup>a</sup> Cross-linked residue pairs and <sup>b</sup>their occurrences detected by MS. Residue 0 is for N-terminal amino group.

**Supplementary Table S3. Occurrences of amines in cross-links determined experimentally or predicted by MD<sup>a</sup>**

| Position of amine | Sequence       | Cross-link frequency | Occurrence in MD (%) |
|-------------------|----------------|----------------------|----------------------|
| 0                 | N-term.        | 83                   | 4.33                 |
| 6                 | FM <b>K</b> GL | 20                   | 7.71                 |
| 10                | LS <b>K</b> AK | 7                    | 5.22                 |
| 12                | KA <b>K</b> EG | 56                   | 11.34                |
| 21                | AE <b>K</b> TK | 11                   | 3.56                 |
| 23                | KT <b>K</b> QG | 41                   | 12.02                |
| 32                | AG <b>K</b> TK | 17                   | 15.25                |
| 34                | KT <b>K</b> EG | 47                   | 5.49                 |
| 43                | GS <b>K</b> TK | 13                   | 11.61                |
| 45                | KT <b>K</b> EG | 37                   | 4.38                 |
| 58                | AE <b>K</b> TK | 14                   | 8.95                 |
| 60                | KT <b>K</b> EQ | 24                   | 8.23                 |
| 80                | AQ <b>K</b> TV | 9                    | 7.47                 |
| 96                | FV <b>K</b> KD | 6                    | 4.72                 |
| 97                | V <b>K</b> KDQ | 19                   | 3.81                 |
| 102               | LG <b>K</b> NE | 0                    | 5.69                 |

<sup>a</sup>Sequential neighbors of lysines (highlighted with bold “K” in the central position) and the frequency of lysines and the N-terminal amino group identified in cross-links by MS, and the time fraction (%) of the MD simulation a lysine and the N-terminal is within cross-linking distance of another amine with no steric hindrance for cross-linking.

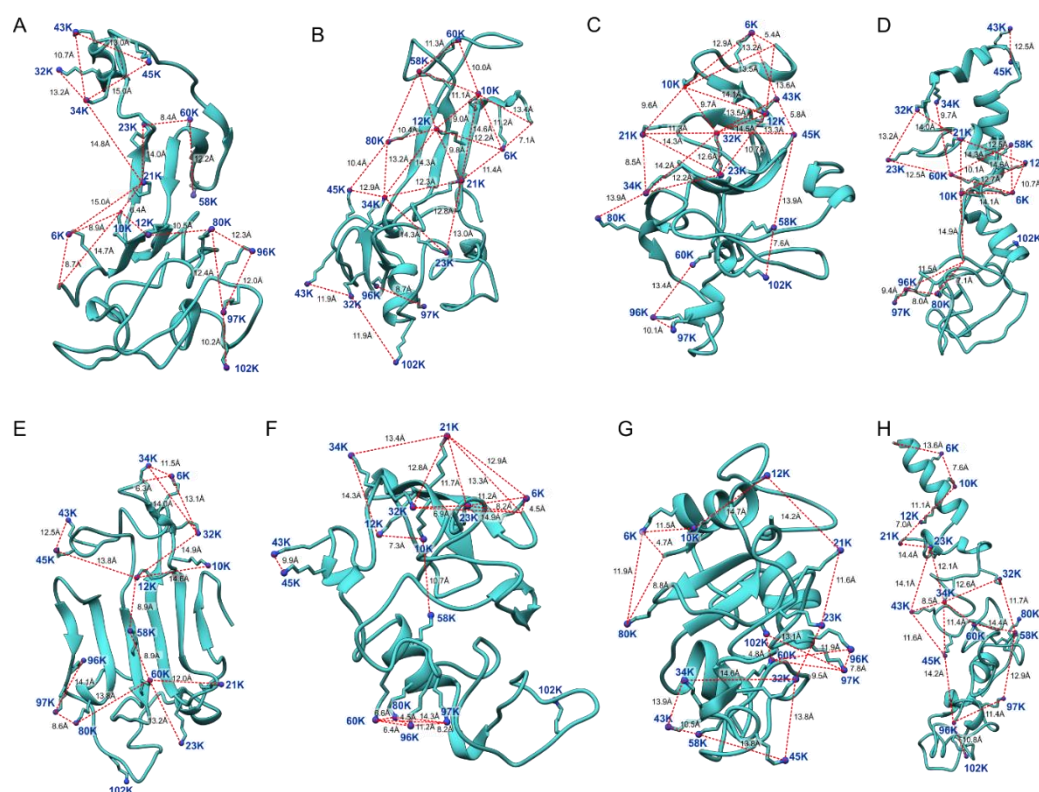

**Figure S1. Amine distances in representative model structures of monomer  $\alpha$ -syn.** Dashed lines in red show amine pairs within 15 Å distance potentially suitable for cross linking. These pairs rarely can be found in amyloid structures of  $\alpha$ -syn (see Section 2.1). Altogether, 60 pairs were identified, 33 of which were observed experimentally by cross-linking with DTSSP (see Section 2.4).

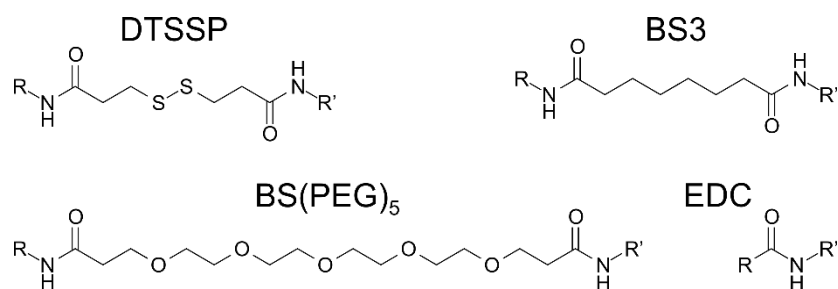

**Figure S2. Cross-links applied in this study on  $\alpha$ -syn.** DTSSP, BS3, and BS(PEG)<sub>5</sub> connect amines, while EDC links Lys to Asp or Glu. We carried out detailed studies using DTSSP.

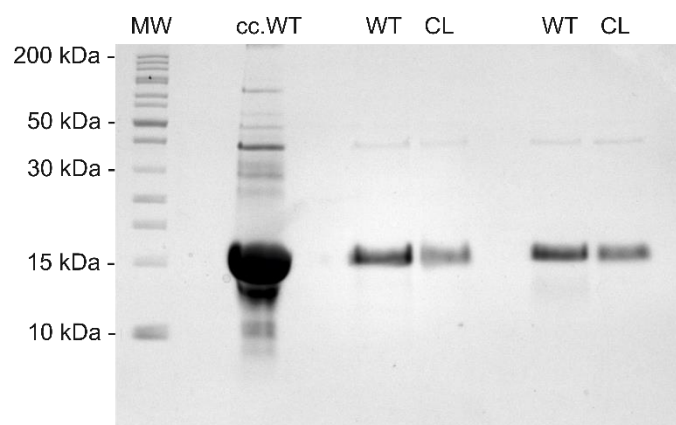

**Figure S3. Cross-linking reaction on  $\alpha$ -syn examined by non-reducing SDS-page.** Cc. WT indicates concentrated unmodified  $\alpha$ -syn sample containing high amount,  $\sim 10 \mu\text{g}$  protein. WT indicates samples without cross-linking, CL indicates samples cross-linked by DTSSP. (Left) reaction was carried out in MES buffer, pH 7.0, (right) reaction was carried out in PBS, pH 7.4. These results show that cross-links were formed only intramolecularly.

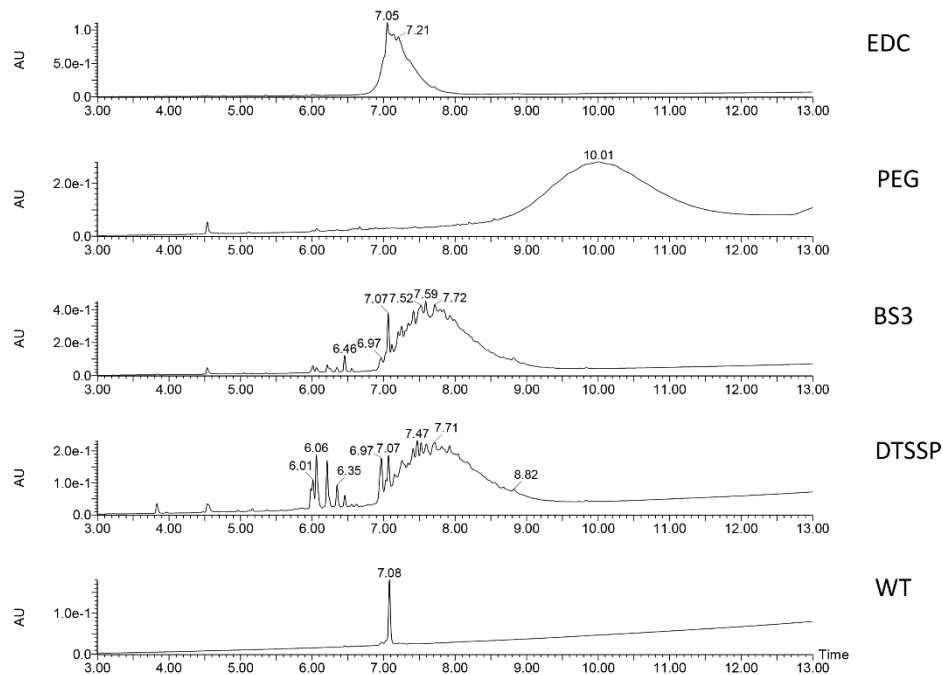

**Figure S4. HPLC-UV chromatograms of cross-linked and unmodified  $\alpha$ -syn.** Comparison to unmodified  $\alpha$ -syn (labeled as 'WT') shows a low fraction of the unmodified molecules, and the broad bands of cross-linked samples suggest the large heterogeneity in cross-linking. Liquid chromatography separation of the protein and its modified variants was performed on a C4 column using a 5-60% acetonitrile gradient (see *Material and Methods*).

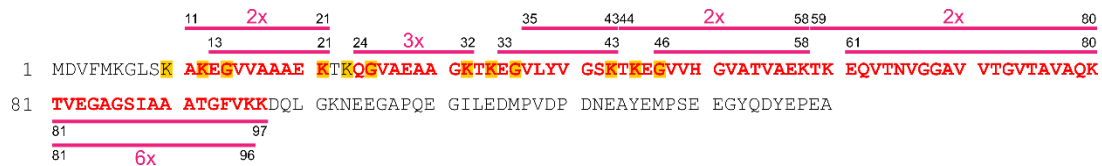

**Figure S5.  $\alpha$ -Syn fragments identified after trypsin digestion by LC-MS/MS technique.** We have found a smooth coverage of the  $\alpha$ -syn sequence, except for the 81-96 region. The four KXXKG sequence motifs are highlighted with yellow. The amino group of the central Lys of these, together with the N-terminal amino group (5 sites out of the possible 15) appeared in 93% of the detected cross-links at one or both sides, which, based on the above results, cannot be artifacts from the MS technique.

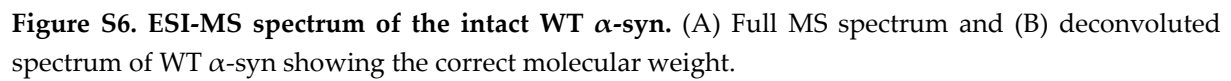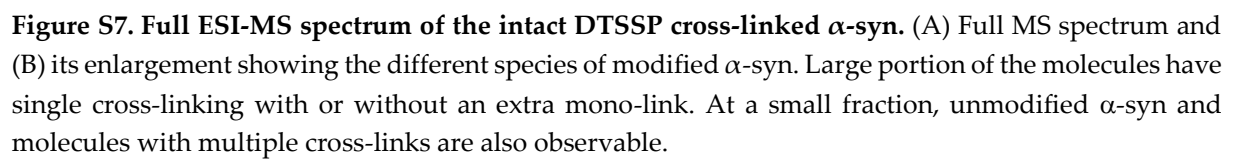

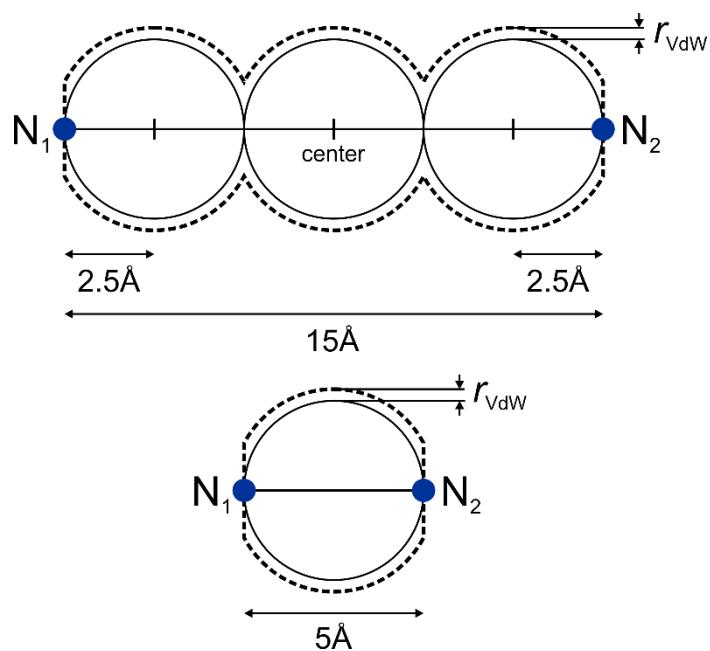

**Figure S8. Examination if there is no steric hindrance for cross-linking.** For a sterically realizable cross-link, the “non-occupied” space between the amines was verified as devoid volume of three overlapping spheres of 5 Å diameter positioned between the two nitrogen atoms as shown above and described in the *Materials and Methods* section. When the distance between the nitrogens is as low as 5 Å, the three spheres fuse to a single one. Using these spheres makes the calculation of steric hindrance in the structures of the MD trajectory reasonably fast.
